# Supplementary material for: Local strain effect on the thermal transport of graphene nanoribbons: a molecular dynamics investigation
Source: Royal Society of Chemistry journal article supplement (doi:10.1039/c4cp06014h), 2015-01-01
Supplement: c4cp06014h1.pdf [file c4cp06014h1.pdf]

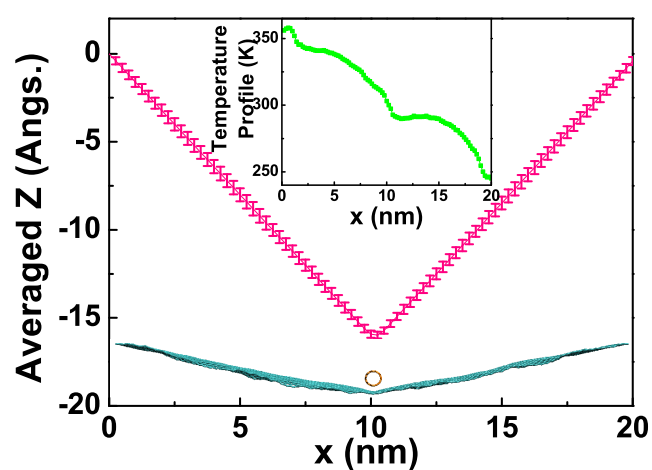

**Fig. A1** (color on line) Vertical deflection profiles. The indented CNT lies across the plane and indented to a depth of 15 Å, as showed in the lower inset snapshot. Error bars correspond to out-of-plane oscillation magnitude from the average height. The upper inset figure plots the temperature profile for the GNR.

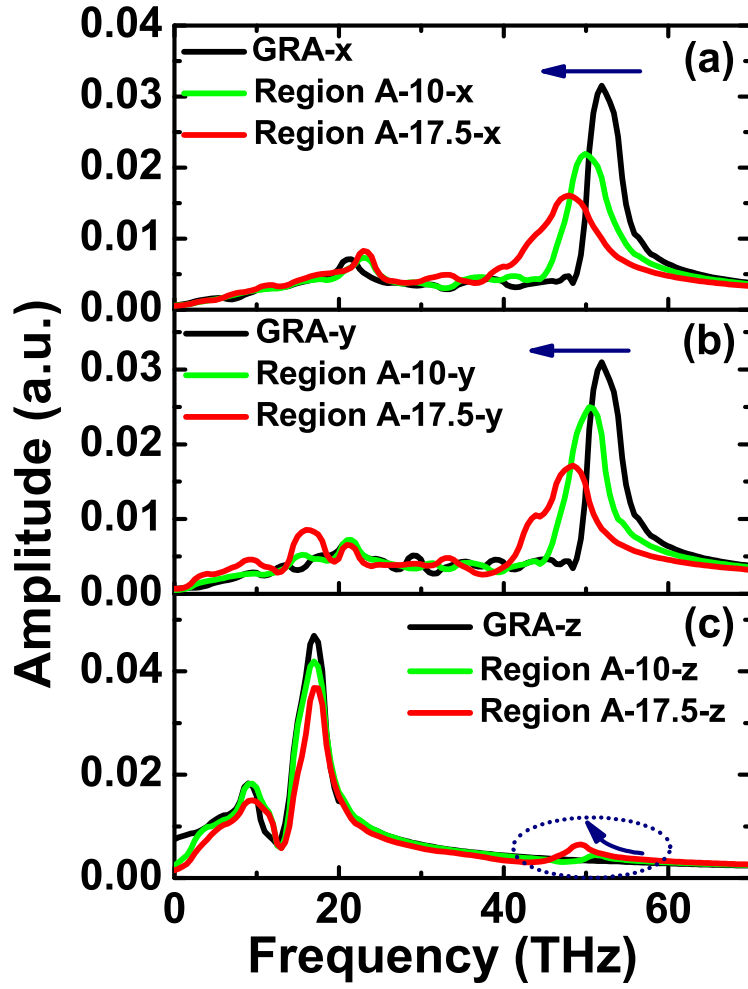

**Fig. A2** (color on line) The  $x, y, z$  components of the phonon spectrums for pristine and indented GNR. Definition for region A is the same as that in Figure 3, and the indentation depth is 10 Å and 17.5 Å, respectively.
